1 **ABCB-mediated auxin transport in outer root tissues regulates lateral root**  
2 **spacing in *Arabidopsis***

3 Jian Chen<sup>1,2,\*</sup>, Yangjie Hu<sup>3,\*</sup>, Pengchao Hao<sup>4</sup>, Yuqin Zhang<sup>3</sup>, Ohad Roth<sup>3</sup>, Maria F. Njo<sup>1,2</sup>, Lieven Sterck<sup>1,2</sup>,  
4 Yun Hu<sup>5</sup>, Yunde Zhao<sup>5</sup>, Markus Geisler<sup>4</sup>, Eilon Shani<sup>3</sup>, Tom Beeckman<sup>1,2#</sup>, Steffen Vanneste<sup>1,2,6#</sup>

5

6 **Affiliations:**

7 <sup>1</sup> Department of Plant Biotechnology and Bioinformatics, Ghent University, 9052 Ghent, Belgium

8 <sup>2</sup> Center for Plant Systems Biology, VIB, 9052 Ghent, Belgium

9 <sup>3</sup> School of Plant Sciences and Food Security, Tel-Aviv University, 69978 Tel-Aviv, Israel

10 <sup>4</sup> Department of Biology, University of Fribourg, CH-1700 Fribourg, Switzerland

11 <sup>5</sup> Section of Cell and Developmental Biology, University of California San Diego, La Jolla, CA, USA

12 <sup>6</sup> Lab of Plant Growth Analysis, Ghent University Global Campus, Incheon 21985, Republic of Korea

13 \* joint first authors

14 **Correspondence:** [tobee@psb.vib-ugent.be](mailto:tobee@psb.vib-ugent.be) (Tom Beeckman); [steffen.vanneste@ugent.be](mailto:steffen.vanneste@ugent.be) (Steffen  
15 Vanneste)

16 **Author contributions**

17 J.C. generated and analyzed the TAS1c-lines, the phylogenetic tree, the ABCB promotor reporters and  
18 genomic YFP-ABCB constructs. Yangjie H. generated and analyzed amiRNA and CRISPR lines, cloned  
19 several fluorescent fusion ABCB overexpression lines and performed the auxin inducible cell-type  
20 experiments. O.R assisted in amiRNA and CRISPR cloning. Y.Z. identified the *amiRNA-2572* line. P.H.  
21 performed auxin transport assays. M.F.N made anatomical sections of GUS reporters. L.S. analyzed the  
22 sequencing results. Yangjie H. and Yun H. developed the tissue-specific auxin-biosynthesis materials.  
23 M.G., E.S., Y.Z., T.B. and S.V. supervised the experiments and data analysis. All authors contributed to  
24 the writing of the text.

25

26

27

28

29

30

31

## 32 **ABCB-mediated auxin transport in outer root tissues regulates lateral root** 33 **spacing in *Arabidopsis***

34 Jian Chen<sup>1,2,\*</sup>, Yangjie Hu<sup>3,\*</sup>, Pengchao Hao<sup>4</sup>, Yuqin Zhang<sup>3</sup>, Ohad Roth<sup>3</sup>, Maria F. Njo<sup>1,2</sup>, Lieven Sterck<sup>1,2</sup>,  
35 Yun Hu<sup>5</sup>, Yunde Zhao<sup>5</sup>, Markus Geisler<sup>4</sup>, Eilon Shani<sup>3</sup>, Tom Beeckman<sup>1,2#</sup>, Steffen Vanneste<sup>1,2,6#</sup>

36

### 37 **Abstract**

38 Root branching is an important strategy to explore efficiently large volumes of soil. To economize this  
39 process, lateral roots (LR) are formed along the growing root at discrete positions that are instructed  
40 by oscillating auxin signals derived from the lateral root cap (LRC). This assumes that auxin moves from  
41 the LRC across multiple layers to accumulate in the pericycle. Here, we identified, using gene silencing  
42 and CRISPR based approaches, a group of five genetically linked, closely related ABCBs that control LR  
43 spacing by modulating the amplitude of the auxin oscillation. The transporters localize to the plasma  
44 membrane and reveal significant auxin export activity. These ABCBs are mainly expressed in the LRC  
45 and epidermis where they contribute to auxin transport towards the root oscillation zone. Our findings  
46 highlight the importance of auxin transport in the outer tissues of the root meristem to regulate LR  
47 spacing.

48

### 49 **Introduction**

50 The root system of plants is of vital importance for their growth and survival as it anchors the plant in  
51 the soil and is required for the uptake of water and nutrients and symbiotic interactions. The complexity  
52 of root systems can be easily expanded by LR branching according to environmentally imposed  
53 limitations and stimuli<sup>1</sup>. LR development is a multistep process occurring over a long time, involving  
54 coordinated signaling across several tissues<sup>2</sup>. The plant hormone auxin is a key regulator of many  
55 organogenetic events in plants<sup>3</sup>. Its local accumulation triggers dramatic, preprogrammed  
56 transcriptional changes that are associated with the progression of the developmental program<sup>3</sup>. This  
57 is also the case for LR development, where auxin accumulation defines the spacing of prebranch sites  
58 along the primary root, and thus root architecture complexity<sup>4,5,6,7</sup>. Therefore, plants have established  
59 intricate mechanisms to control auxin distribution within tissues<sup>8,9</sup>, which can be adjusted according  
60 to the developmental stage, hormonal and environmental signals<sup>1</sup>. Under normal conditions, the initial

61 decision for LR initiation is not made where low-sensitive auxin signaling output reporters in pericycle  
62 cells are observed, but rather in a zone more proximal to the meristem<sup>6, 10</sup>. In this zone, called the  
63 oscillation zone (OZ), oscillatory gene expression was reported to correlate with the activity of the  
64 sensitive auxin signaling output reporter *DR5::LUC*<sup>5</sup>. This periodic auxin signaling selects a subset of  
65 cells, together denominated as a prebranch site, to gain a higher competence to form a LR reflected in  
66 a maintained expression of the auxin output reporter *DR5::LUC*.<sup>5</sup> Indole-butyric acid (IBA) to indole-  
67 5-acetic acid (IAA) conversion in the LRC contributes to the amplitude of this oscillation<sup>11, 12</sup>, and cyclic  
68 programmed cell death of the LRC contributes to the frequency of this oscillation<sup>7</sup>.

69 The prevailing model of auxin transport in the meristem can best be summarized as a reverse  
70 fountain of auxin flowing rootward through the vascular tissue and being redirected shootward  
71 through the outer layers of the meristem<sup>13</sup>. This outer shootward auxin flow is thought to rejoin the  
72 central rootward auxin flow (Fig. 1a). The radial inward movement of auxin released from LRC cells  
73 undergoing programmed cell death could then contribute to periodic peaks of *DR5::LUC* that are  
74 instructive for LR positioning<sup>7</sup>. The IAA<sup>-</sup>/H<sup>+</sup> symporter AUX1<sup>14</sup> represents the major component in the  
75 auxin uptake mechanism of the inward radial auxin transport route that controls prebranch site  
76 formation<sup>6, 7</sup>. However, the corresponding efflux components remain elusive. Currently, the auxin efflux  
77 component of the shootward auxin transport in the outer cell layers of the root is believed to be largely  
78 explained by the PIN2 auxin transporter<sup>15</sup>, in conjunction with the ABCB-type auxin transporters,  
79 ABCB1 and ABCB19<sup>16</sup>. However, neither the *pin2* mutant, nor the *pin2,abcb1,abcb19* triple mutant  
80 showed reduced LR densities or reduced IBA-induced LR formation<sup>7</sup>. This suggests that our current  
81 model contains important inaccuracies or shortcomings at least at the level of the molecular identity  
82 of the auxin efflux machinery in the root meristem.

83 Here, we aimed at identifying auxin transporters in the outer tissues of the root that have a role in LR  
84 spacing. Therefore, we screened the ABCB transporter family via a tissue-specific gene-silencing  
85 approach. We found five closely related ABCBs that are required for LR spacing via modulation of the  
86 *DR5::LUC* oscillation amplitude. These ABCBs localize to the plasma membrane and transport auxin out  
87 of the cell. Their predominant expression in LRC and epidermis, and the LR defects in the knock-  
88 down/out lines is consistent with these ABCBs acting as effectors of auxin transport in the outer layers  
89 of the root meristem that instructs LR spacing.

90

## 91 Results

### 92 An uncharacterized cluster of five ABCBs controls LR density

93 Lateral root initiation and spacing depend on an intricate auxin transport mechanism in the root  
94 meristem that can be inhibited via auxin-transport inhibitors such as NPA and BUM<sup>7, 17, 18</sup> (Fig. 1a).  
95 Because both inhibitors are thought to target, among others, the auxin-transporting ABCBs<sup>18, 19, 20</sup>, we  
96 reasoned that members of the full-sized 22 ABCB protein family<sup>21</sup> (Fig. 1b) are involved in auxin  
97 transport for LR spacing.

98 To screen the *ABCB* family for members that are potentially involved in inward radial auxin  
99 transport (between the LRC and the pericycle), we used synthetic trans-acting small-interfering RNAs  
100 (syn-tasiRNAs) in the *AtTAS1c* backbone<sup>22</sup>. Based on three syn-tasiRNAs per ABCB subgroup we could  
101 theoretically target 21 out of 22 ABCBs: subgroup I: ABCB1,B2,B6,B10,B13,B14,B19,B20 (*AtTAS1c-*  
102 *ABCB-I*), subgroup II: ABCB2,B3,B5,B7,B9,B11,B12,B21 (*AtTAS1c-ABCB-II*), and subgroup III:  
103 ABCB15,B16,B17,B18,B22 (*AtTAS1c-ABCB-III*) (Fig. 1b). For each subgroup, we designed two  
104 independent and distinct syn-tasiRNAs to account for variation in silencing efficiency and specificity  
105 (indicated as 'a' and 'b') and expressed them in the LRC, epidermis and cortex via the *PIN2* promoter<sup>23</sup>.  
106 We determined the LR density of at least two independent, homozygous, single locus lines per  
107 construct, relative to WT grown on the same plate, hence analyzing at least 4 independent lines per  
108 ABCB subgroup (Fig. 1c). One of the constructs targeting subgroup I ABCBs (*AtTAS1c-ABCB-Ib*) resulted  
109 in a significant reduction of LR density, and both constructs reduced the primary root length (Fig. 1c,  
110 Supplementary Fig. 1). None of the *AtTAS1c-ABCB-II* lines showed a significant change in LR density or  
111 root length. Interestingly, all tested (six) *AtTAS1c-ABCB-III* lines showed significant reductions in LR  
112 density and root length (Fig. 1c, Supplementary Fig. 1). We could validate the reduction in LR density  
113 of 4 independent *AtTAS1c-ABCB-III* lines, but not the reduction in root length, which was seen in the  
114 initial phenotypical screen (Supplementary Fig. 2). This highlights *ABCB15*, *B16*, *B17*, *B18* and *B22* as  
115 potential regulators of LR development. In order to test whether single knockouts would be sufficient  
116 to express a LR phenotype, we obtained T-DNA insertion lines in these *ABCBs*. However, none of them  
117 showed a defect in root growth and LR formation (Supplementary Fig. 3), indicating a strong functional  
118 redundancy as described for other ABCB family members<sup>24, 25, 26, 27, 28</sup>.

119

120

121           Importantly, all members of the subgroup are clustered within 57.6 kb on chromosome 3, limiting  
122 the generation of multi-knockouts by crossing T-DNA lines. Therefore, to validate the observed  
123 *AtTAS1c-ABCB-III* phenotypes, we followed two independent knock-down/out approaches. On the one  
124 hand, we identified, within a collection of artificial microRNA (amiRNA) lines<sup>26</sup>, *pro35S::amiR-2572*  
125 (named *amiR-2572*), that targets several of the same ABCBs as the syn-tasi constructs (*ABCB16*, *ABCB17*,  
126 *ABCB22*) (Supplementary Fig. 4a). On the other hand, we generated an *abcb*<sup>*b15,b16,b17,b18,b22*</sup> mutant via  
127 genome editing using 4 sgRNAs, each targeting multiple members of this *ABCB* subgroup  
128 (Supplementary Fig. 4b). We identified one line, named *b15-b22*<sup>CRISPR</sup>, in which we could not amplify a  
129 3502bp fragment of *ABCB15*, a 1121 bp fragment of *ABCB16*, a 1520 bp fragment of *ABCB17* and which  
130 had a deletion in *ABCB18* and a single bp insertion in *ABCB22* that causes a premature stop codon, thus  
131 likely being a null mutant in these genes (Supplementary Fig. 4c,d). Using Nanostring-based mRNA  
132 quantification, we could, however, not reliably detect transcriptional downregulation of any of the  
133 targeted *ABCBs* in our knock-out/down lines, with the exception of *ABCB15*, being significantly  
134 downregulated in *b15-b22*<sup>CRISPR</sup> (Supplementary Fig. 4a). Additionally, the non-targeted *ABCB4* and  
135 *ABCB19* were respectively up- and downregulated in *b15-b22*<sup>CRISPR</sup> (Supplementary Fig. 4a) indicating  
136 complex interactions among auxin-transporting ABCBs, calling for caution in interpreting observed  
137 phenotypes.

138           Both *amiR-2572* and *b15-b22*<sup>CRISPR</sup> showed a strong reduction in primary root length (Fig. 2b,c,  
139 and LR density (Fig. 2b,d). Moreover, both lines had a smaller rosette size in soil and *b15-b22*<sup>CRISPR</sup> had  
140 reduced fertility (Supplementary Fig. 4e,f). This suggests that the non-tissue-specific interference with  
141 the expression of these ABCBs results in pleiotropic phenotypes. In another genome-editing approach  
142 we generated a 54kbp deletion mutant in which the entire region was deleted, whilst retaining a  
143 chimeric fragment of both *ABCB15* and *ABCB22* (Supplementary Fig 5a,b). In contrast to *b15-b22*<sup>CRISPR</sup>,  
144 this large fragment deletion (*ldf-A7*) mutant did not display any obvious phenotypes (Supplementary  
145 Fig 5c-f), suggesting the induction of a compensation mechanism, eg. similar to the recently described  
146 interallelic complementation<sup>29</sup>, or via a compensatory (non)-transcriptional activation of other  
147 transport mechanisms. Despite the unresolved issue with the 54 kb deletion mutant, we argue that 3  
148 independent knock-down constructs and one CRISPR knock-out showing similar LR phenotypes  
149 represent compelling evidence for the involvement of the subgroup III ABCBs in LR spacing.

150

151 **Subgroup III ABCBs define a new group of plasma membrane-localized auxin exporters**

152 Because multiple ABCBs have known auxin transport activities<sup>26, 30, 31</sup>, we postulated that the targeted  
153 ABCB subfamily are also *bona fide* auxin transporters. Therefore, the coding regions of *ABCB15*, *B16*,  
154 *B17*, *B18* and *B22* were fused to *YFP*. Stable transgenic Arabidopsis YFP fusion lines were generated,  
155 all showing plasma membrane localization (Fig. 3a). Protoplasts prepared from Agrobacterium-  
156 transfected in *N. benthamiana* leaves showed increased IAA export for all 5 ABCBs at rates comparable  
157 to those of the canonical auxin transporting ABCB1<sup>32</sup> (Fig. 3b). In contrast, none of these ABCBs  
158 enhanced export of the diffusion control, benzoic acid, (Fig. 3c). Together, the results suggest that the  
159 subgroup III ABCBs are plasma membrane localized auxin exporters. In agreement, all 5 ABCBs  
160 contained a conserved D/E-P motif in the C-terminal nucleotide binding fold that is diagnostic for auxin-  
161 transporting ABCBs<sup>21</sup>.

162 Next, we analyzed the expression pattern of the five subgroup III ABCBs. We found strong  
163 expression of *ABCB15*, *B16*, *B17* and *B22* in the root meristem (Fig. 4a-d) and for *ABCB16* in all stages  
164 of LR development (Supplementary Fig. 6a). *ABCB18* was almost not expressed in the root meristem,  
165 but showed very weak expression in vascular tissues of the hypocotyl and mature root tissues (Fig. 4e;  
166 Supplementary Fig. 6c). Besides their root expression, *ABCB15*, *B17* and *B22* were also expressed in  
167 cotyledons, leaves and shoot meristem regions (Fig. 4a-d). Interestingly, detailed inspection of the  
168 expression pattern using confocal microscopy showed that their root meristematic expression was  
169 largely specific to the epidermis and LRC (Fig. 4e,f). This is consistent with a role in the auxin transport  
170 mechanism through which the LRC communicates with the main root for LR spacing.

171

172 **Subgroup III ABCBs control the amplitude of auxin oscillations that instruct LR spacing.**

173 To test the hypothesis that subgroup III ABCBs control LR initiation, we zoomed into the origin of the  
174 LR defects of *AtTAS1c-ABCB-IIIa*. For two independent lines, we found that the reduced density of LRs  
175 was associated with an overall reduction in the number of LR primordia (LRP). Mainly, the early LRP  
176 stages (stages I, II and III) were reduced, without accumulating intermediate stages of LRP development  
177 (stages V-VII) (Fig. 5a,b). Similarly, *amiR-2572* showed a strong reduction in the early LRP stages,  
178 without accumulating intermediate LRP stages (Fig. 2e,f). These data demonstrate that the reduced  
179 density of emerged LRs in these lines is due to a defect at the level of initiation.

180 Lateral root initiation (stage I) is the first morphological hallmark of LR formation, and is preceded

181 by a local maximum of auxin signaling, that can be visualized using *DR5:LUC*, referred to as prebranch  
182 sites<sup>5</sup>. Consistently with the reduced LR initiation, *AtTAS1c-IIIa* showed fewer prebranch sites (Fig. 5c-  
183 e). The *DR5:LUC* oscillation period in the *AtTAS1c-IIIa* was similar to that of the wild type (Fig. 5f,g),  
184 suggesting that LRC programmed cell death was not affected. In contrast, the *DR5:LUC* oscillation  
185 amplitude in the *AtTAS1c-IIIa* lines was significantly lower than in the WT (Fig. 5f,h), suggesting that not  
186 every auxin oscillation develops into a prebranch site and subsequently into a new LR. This suggests  
187 that subgroup III ABCBs are part of the auxin homeostasis mechanism that determine *DR5:LUC*  
188 oscillation amplitude.

189 Previously, we inferred from tissue-specific complementation assays and *in silico* modeling that  
190 shootward auxin transport in the LRC is a critical determinant of oscillation amplitude<sup>7, 11, 12</sup>. The  
191 expression patterns of the subgroup III ABCBs and their knock-down phenotypes indicate that they  
192 could represent the elusive efflux component in this model. To test this hypothesis, we generated an  
193 estradiol-inducible auxin biosynthesis system driven specifically in the quiescence center (QC)  
194 (*pWOX5:XVE>>YUC1-2A-TAA1*). Simultaneous expression of *YUC1* and *TAA1* results in IAA synthesis  
195 from tryptophan<sup>33, 34</sup>. In the control, estradiol treatment induced a strong ectopic *DR5:VENUS*  
196 expression in the LRC, epidermis and the stele in the elongation zone within 7.5h. These effects were  
197 further enhanced after 9h estradiol treatment (Fig. 6a). This suggests that the auxin that was produced  
198 in the QC, was transported shootward via the LRC and epidermis towards the tissues of the elongation  
199 zone, where it activated *DR5-VENUS* expression. In *amiR-2572*, the induction of *DR5:VENUS* in the  
200 elongation zone was at both time-points severely reduced compared to the WT (Fig. 6a,b). These data  
201 demonstrate that subgroup III ABCBs contribute to shootward auxin transport in the meristem. These  
202 data, together with the expression patterns and phenotypes, are consistent with subgroup III-ABCBs  
203 being part of the shootward auxin flux in the outer layers of the meristem, that contributes to the  
204 *DR5:LUC* oscillation amplitude and LR spacing.

205

## 206 Discussion

207 At its core, spacing of LRs in *Arabidopsis* can be simplified as the periodic activation of auxin signaling  
208 in the pericycle<sup>5, 6, 12</sup>. This model of LR spacing, assumes a local build-up of auxin that triggers LR  
209 initiation when an auxin signaling threshold is surpassed<sup>12</sup>. Surprisingly, the LRC plays a central role in  
210 this oscillatory auxin accumulation that determines LR spacing. On the one hand, the LRC contributes



211 to the overall pool of auxin in the meristem via the local conversion of IBA to IAA<sup>11</sup>. On the other hand,  
212 dying LRC cells release auxin into the epidermis, resulting in a temporal rise in pericyclic auxin<sup>7</sup>. Periodic  
213 cell death in the LRC thus explains the oscillation of auxin activity in the pericycle to instruct LR spacing.  
214 In both cases, the LRC contribution to LR spacing assumes auxin transport from the LRC to the pericycle.  
215 This auxin transport mechanism involves the AUX1 IAA:H<sup>+</sup> uptake carrier in the LRC<sup>7</sup>. Currently, the  
216 molecular nature of the auxin efflux machinery involved in LR spacing remains elusive.  
217 In an attempt to identify the missing auxin transporter(s), we delved deeper into the potentially  
218 massive functional redundancy within the ABCB gene-family, that contains multiple auxin  
219 transporters<sup>30</sup>. We identified a group of closely related ABCBs (*ABCB15*, *ABCB16*, *ABCB17*, *ABCB18* and  
220 *ABCB22*) that are required for LR spacing. We demonstrated that these ABCBs are plasma membrane-  
221 localized auxin exporters that contribute to the *DR5:LUC* oscillation amplitude, via effecting shootward  
222 auxin transport in the meristem. Interestingly, these ABCBs are largely co-expressed with *AUX1* in the  
223 outer tissues of the root meristem, suggesting they act in conjunction with *AUX1* in the LRC and  
224 epidermis. Although this finding adds a new piece to the puzzle, it remains unclear whether this new  
225 cluster of ABCBs auxin transporter also bridges the cortex and endodermis, to feed into the pericyclic  
226 auxin pool and to surpass the critical auxin level that triggers LR initiation.  
227 Recently, passive auxin diffusion via plasmodesmata, intercellular pores that linking the cytoplasm of  
228 adjacent cells, was shown to markedly improve the accuracy of simulated auxin distribution patterns  
229 in the root apical meristem<sup>35</sup>. Therefore, it will be of interest to evaluate the contribution of symplastic  
230 connectivity between the radial layers of the root to prebranch site formation and LR spacing.

231

## 232 **Materials and methods**

### 233 **Plant material and growth conditions**

234 *Arabidopsis thaliana* Colombia (Col-0) ecotype, was used as wild type. *abcb15-1* (SALK\_034562),  
235 *abcb16-1* (SALK\_006491), *abcb17-1* (SALK\_002801), *abcb18-1* (SALK\_013774), and *abcb22-1*  
236 (SALK\_202270) mutant seeds were obtained from NASC. *Arabidopsis* transgenic lines *DR5rev:VENUS-*  
237 *N7*<sup>36</sup> and *DR5:Luciferase (DR5:LUC)*<sup>5</sup> were crossed and homozygous lines were selected and used as T0  
238 for *AtTAS1c-ABCBs* transformation. *Arabidopsis* seeds were surface sterilized by chlorine gas, seeds  
239 were then sown in Petri dishes (12 cm X 12 cm) containing sterile half-strength Murashige and Skoog



240 medium (0.5 x MS salts, 0.8% sucrose, 0.5 g/L 2-(N-morpholino) ethanesulfonic acid, pH 5.7, and 0.8%  
241 w/v agar), and grown under continuous light, after 3 days vernalization at 4°C.

## 242 **Plasmid construction**

243 Most constructs were generated by the Gateway system<sup>®</sup> (Invitrogen, Carlsbad, CA, USA). To construct  
244 the YFP fusion, coding sequences amplified from genomic DNA were cloned into pDONR-P2R-P3  
245 (ThermoFisher Scientific) using the primers listed in Supplementary Table 1. The 35S driven N-terminal  
246 YFP fusion expression clones were constructed by recombining pEN-L4-35S-R1<sup>37</sup>, pEN-L1-Y-L2<sup>37</sup> and the  
247 respective CDS clones into pH7m34GW using multisite LR Gateway reaction. For the  
248 promoter::NLSGFP-GUS reporters, ~2kb promoter fragments upstream of the coding sequence were  
249 amplified from genomic DNA using primers listed in Supplementary Table 2, and subsequently cloned  
250 into pENTR™ TOPO® vector (pENTR™/D-TOPO® Cloning Kits, ThermoFisher Scientific) to generate the  
251 corresponding entry clones. The promoter::NLSGFP-GUS was generated by performing an LR  
252 recombination reaction between Nuclear GFP fusion (pEN-L1-NF-L2)<sup>37</sup>, GUS reporter (pEN-R2-S\*-L3)<sup>37</sup>  
253 and pH7m34GW<sup>37</sup>. *AtTAS1c-ABCs* constructs were generated using primers TAS-Ia/b-F/R, TAS-IIa/b-  
254 F/R and TAS-IIIa/b-F/R (Supplementary Table 3) as described<sup>22</sup>.

255 The *pWOX5:XVE>>YUC1-2A-TAA1* construct was generated by cloning the *YUC1-2A-TAA1* cassette into  
256 XhoI and SpeI sites of the pER8 vector<sup>38</sup>. The full-length cDNA of *YUC1* was cloned into the BamHI site  
257 and the full-length cDNA of *TAA1* into the BglII site of the pM2A vector containing 2A peptides<sup>39</sup>. For  
258 QC-specific activation of the *YUC1-2A-TAA1* cassette, the genomic DNA of *WOX5* promoter  
259 (*WOX5*pF :CAATATATCCTGTCAAACaaagacttttatctaccaacttcaa; *WOX5*pR:  
260 GCCGTTAACGCTTTCATcgttcagatgtaaagtctcaactgt) was used.

261

## 262 **Generation of *pWOX5:XVE>>YUC1-TAA* lines**

263

264 *pWOX5:XVE>>YUC1-2A-TAA1* (*pWOX5>>YUC1-TAA1*) was introduced into *DR5:VENUS* background by  
265 transformation and 10 independent lines were selected. Homozygous lines for both *pWOX5>>YUC1-*  
266 *TAA1* and *DR5:VENUS* were crossed to *amiR-2572* lines to generate F1 seeds. Homozygous plants for  
267 *pWOX5>>YUC1-TAA1*, *DR5:VENUS* and *amiR-2572* were gained by resistance selection and  
268 phenotyping in F3 population. Similarly, *amiR-2572* line was crossed with *DR5:VENUS* to generate F1

269 seeds and F3 homozygous for both constructs were obtained.

270

### 271 ***Agrobacterium* and *Arabidopsis* transformation**

272 *Agrobacterium tumefaciens* strain GV3101 was transformed with the relevant binary plasmids via the  
273 freeze-thaw procedure<sup>40</sup>. An individual PCR confirmed *Agrobacterium* colony was used for floral dip<sup>41</sup>.  
274 Transformants were selected and the segregation of the T2 analyzed using appropriate antibiotics.

275

### 276 **Phenotyping and LR staging**

277 To quantify the LR phenotype in wild-type plants and mutants, emerged LR of whole seedlings were  
278 counted under a dissecting microscope, 8 days after germination. Root lengths were measured via Fiji  
279 (ImageJ 1.52n<sup>42</sup>) using digital images obtained by scanning the Petri dishes.

280 To analyze the LR primordium stages, root samples were cleared as described previously<sup>43</sup>. All samples  
281 were analyzed by differential interference contrast microscopy (Olympus BX51).

### 282 **Oscillation and prebranch site**

283 The Luciferase imaging of whole seedlings and oscillation expression analysis was performed as  
284 described<sup>44</sup>. A Lumazon FA imaging system (Nippon Roper) carrying a CCD camera from Princeton  
285 Instruments Ltd. (Trenton, NJ, USA) or NightSHADE LB985 in vivo plant imaging system (BERTHOLD  
286 TECHNOLOGIES) carrying a deep-cooled slow scan CCD camera from Andor Instruments Ltd. (Belfast,  
287 UK) were used for luciferase imaging.

288 To monitor the pre-branch site numbers, we used 8-day-old DR5:LUC seedlings for pre-branch site  
289 quantification. The D-luciferin solution (1 mM) was sprayed gently on the seedlings, and kept for 10min  
290 in the dark and imaged in the Lumazon system with a 15-minute exposure time.

291 For Long-Term Imaging of Luciferase Signal in the root tip, square plates containing 1/2MS medium  
292 were sprayed with 1mM D-Luciferin solution (0.01% Tween80) and left to dry in the dark. Then 3-day-  
293 old DR5:LUC seedlings were transferred on the plates and imaged immediately with a macro lens every  
294 10 minutes with a 7-minute exposure time for indicated times. The period of the *DR5:LUC* oscillations

295 was determined based on the number of frames that spaced a DR5:LUC maximum in the OZ of each  
296 seedling root, multiplied with the time of each cycle.

### 297 **Kymograph**

298 Kymographs ([http://www.embl.de/eamnet/html/body\\_kymograph.html](http://www.embl.de/eamnet/html/body_kymograph.html)) were generated by ImageJ to  
299 visualize the spatiotemporal changes of DR5:LUC signal in the root tips during primary root growth. For  
300 this purpose, a time-lapse movie (TIFF series) was loaded into ImageJ, and a “Z-projection” was  
301 performed to have an overview of the luciferase signal changes following primary root growth over  
302 time. Subsequently, a segmented line was drawn on the newly formed primary root and marked by the  
303 “ROI manage” function. This line was restored in the original TIFF series to generate  
304 “MultipleKymograph”. In our experiments, 3- day-old seedlings were used.

### 305 **Confocal microscopy**

306 For reporter lines and translational fusion, seedlings were imaged on a Zeiss 710 confocal microscope.  
307 For the propidium iodide (PI)-treated root images, seedlings were stained with 2 µg/mL PI for 3 minutes,  
308 washed with water, and used for confocal imaging. For root imaging, GFP was excited at 488 nm and  
309 acquired at 500 to 530 nm. YFP was excited at 514 and the emission between 519-564 nm was collected  
310 for YFP and between 614-735 nm for PI.

311 For the *pWOX5>>YUC1-TAA* experiments seeds were sown on MS plates, stratified at 4°C for 2 days,  
312 and grown vertically in growth chamber for 4 days at 21°C. 4-day-old seedlings of the *pWOX5:YUC1-*  
313 *TAA1*, *DR5:VENUS* in Col-0 and *amiR-2572* background were treated with 5 µM estradiol for the  
314 indicated time-points. Seedlings were stained in 10 mg L<sup>-1</sup> propidium iodide for 2 min and rinsed in  
315 water for 30 s. Confocal microscopy was performed using a Zeiss LSM780 inverted confocal microscope  
316 equipped with a 20×/0.8 M27 objective lens. VENUS and propidium iodide were excited using an argon-  
317 ion laser and a diode laser, respectively. VENUS was excited at 514 nm and detected at 518-588 nm,  
318 propidium iodide was excited at 561 nm and detected at 588-718 nm.

319

### 320 **GUS staining and root sectioning**

321 The GUS assay was performed as previously described<sup>45</sup>. For Arabidopsis cross-section root specimens,  
322 GUS stained seedlings were subjected to fixation, dehydration and embedding as previously  
323 described<sup>46</sup>. GUS-stained tissues were imaged using a Leica Bino and Olympus BX51 microscope for  
324 different tissues.

### 325 **Construction of phylogenetic tree**

326 The evolutionary history was inferred using the Neighbor-Joining method<sup>47</sup>. The percentage of replicate  
327 trees in which the associated taxa clustered together in the bootstrap test with 1000 replicates<sup>48</sup>. The  
328 tree is drawn to scale, with branch lengths in the same units as those of the evolutionary distances  
329 used to infer the phylogenetic tree. The evolutionary distances were computed using the Maximum  
330 Composite Likelihood method and are in the units of the number of base substitutions per site. The  
331 analysis involved 21 nucleotide sequences. All positions containing gaps and missing data were  
332 eliminated. There were a total of 3455 positions in the final dataset. Evolutionary analyses were  
333 conducted in MEGA7<sup>49</sup> and optimized via Interaction Tree Of Life (<https://itol.embl.de/>).

### 334 **Genotyping**

335 T-DNA lines for the ABCB single mutants were ordered from The *Arabidopsis* Information Resource  
336 (<https://www.arabidopsis.org/>), and genotyping primers for T-DNA insertion were designed using the  
337 T-DNA Primer Design Tool powered by Genome Express Browser Server (GEBD)  
338 (<http://signal.salk.edu/tdnaprimers.2.html>). Homozygous mutants were selected by PCR performed  
339 with primers listed in Supplementary Table 4.

340

### 341 **RNA extraction and Nanostring**

342 Total RNA was isolated from the indicated plant materials using the PureLink RNA Mini Kit (Invitrogen).  
343 Nanostring transcript quantification was done as described previously<sup>26</sup>.

### 344 **Auxin transport measurements**

345 Simultaneous <sup>3</sup>H-IAA and <sup>14</sup>C-benzoic acid (BA) export from tobacco (*N. benthamiana*) mesophyll  
346 protoplasts was analyzed as described<sup>19</sup>. Tobacco mesophyll protoplasts were prepared 4 days after  
347 agrobacterium-mediated transfection with *proS35S:ABCB1-YFP*, *pro35S:YFP-ABCB15*, *pro35S:YFP-*  
348 *ABCB16*, *pro35S:YFP-ABCB17*, *pro35S:YFP-ABCB18*, *pro35S:YFP-ABCB22*. Relative export from

349 protoplasts is calculated from exported radioactivity into the supernatant as follows: (radioactivity in  
350 the protoplasts at time  $t = 10$  min.) - (radioactivity in the supernatant at time  $t = 0$ ) \* (100%)/  
351 (radioactivity in the supernatant at  $t = 0$  min.); presented are mean values from >4 independent  
352 transfections.

### 353 **CRISPR/Cas9 mutagenesis and selection of mutant alleles**

354 Four single-guide (sg) RNAs were designed using the CRISPR-P tool ([http://cbi.hzau.edu.cn/cgi-](http://cbi.hzau.edu.cn/cgi-bin/CRISPR)  
355 [bin/CRISPR](http://cbi.hzau.edu.cn/cgi-bin/CRISPR))<sup>50</sup> to align the ABCBs coding sequence. The sgRNAs are designed to target multiple ABCBs  
356 at once: sgRNA-19 targets ABCB16, 18, 22, 17 (20% cleavage), and 15 (0.3% cleavage); sgRNA-20 targets  
357 ABCB18, 22, 16, (92% cleavage), 17 (10% cleavage) and 15 (0.1% cleavage); sgRNA3 targets ABCB16,  
358 18, 17 (0.4% cleavage), and 15 (0.1% cleavage) and sgRNA4 targets ABCB16, 17, 18 (49% cleavage), and  
359 15 (0.1% cleavage). Vectors were assembled using the Golden Gate cloning system<sup>51</sup>. The sgRNA-19,  
360 sgRNA-20, sgRNA-3 and sgRNA-4 were cloned downstream of the *Arabidopsis* U6 promoter (pATU6) in  
361 the Level 1 acceptors pICH47761, pICH47772, pICH47781 and pICH47791, respectively, as previously  
362 described<sup>52</sup>. The Level 1 constructs were assembled in the binary Level 2 vector pAGM4723. sgRNA  
363 sequences are listed in Supplementary Table 5. Genotyping was carried out using primers listed in  
364 Supplementary Table 6.

365 For the large fragment deletion mutant (*ldf*), 3 sgRNAs were designed targeting ABCB15, and another  
366 3 sgRNAs were designed targeting ABCB22. The sgRNAs are listed in Supplementary Table 7. Six sgRNAs  
367 were assembled into *pFASTRK* as described<sup>53</sup>. Pooled T1 plants were screened for a 0.5-1kb amplicon,  
368 using primers spanning the 54kb genomic fragment, as an indicator of the deletion. In the T2  
369 generation, individuals lacking the Cas9 transgene were screened for the amplicon, which was sent for  
370 Sanger sequencing. Genotyping was done using primers listed in Supplementary Table 8.

371 In order to confirm the correct excision and deletion of the targeted region from the genome, we used  
372 NGS. Sequencing was performed on an illumina HiSeq 4000 machine, which yielded 47,827,766 reads  
373 (150nt PE), being 57.8x coverage. The reads were then aligned to the reference ATH Col-0 genome  
374 using BBMap (<https://jgi.doe.gov/data-and-tools/bbtools/>) using default settings. The obtained BAM  
375 files containing the aligned reads was subsequently processed with bedtools genomecov<sup>54</sup> (parameter  
376 settings: -bga -split ). This resulted in a coverage plot reflecting the sequencing depth over the ATH  
377 genome sequence. Exploring the coverage plot clearly showed that the targeted regions was no longer

378 present (indicated by having a coverage of zero ), in our re-sequenced line. Moreover, it also showed  
379 no off-target modifications, nor that the excised region would have been reinserted elsewhere in the  
380 genome.

381 Data supporting the NGS analysis part of this study has been deposited at the ENA under BioProject  
382 number: PRJEB38980 .

383

384

385

386

### 387 **Acknowledgements**

388 We thank Jose Alonso and Thomas Jacobs for providing early access to unpublished materials at the  
389 beginning of this project. This work was supported by grants from the Swiss National Funds (31003A-  
390 165877/1) to M.G., the China Scholarship Council to J.C., the European Research Council Starting Grant  
391 (757683- RobustHormoneTrans) to E.S., the PBC postdoc fellowship to Y.H and Y.Z.

392

393

394

### 395 **REFERENCES**

396

397 1. Motte H, Vanneste S, Beeckman T. Molecular and Environmental Regulation of Root Development.  
398 *Annu Rev Plant Biol* **70**, 465-488 (2019).

399

400 2. Stoeckle D, Thellmann M, Vermeer JE. Breakout-lateral root emergence in *Arabidopsis thaliana*.  
401 *Curr Opin Plant Biol* **41**, 67-72 (2018).

402

403 3. Vanneste S, Friml J. Auxin: a trigger for change in plant development. *Cell* **136**, 1005-1016 (2009).

404

405 4. Dubrovsky JG, *et al.* Auxin acts as a local morphogenetic trigger to specify lateral root founder cells.  
406 *Proc Natl Acad Sci U S A* **105**, 8790-8794 (2008).

407

408 5. Moreno-Risueno MA, Van Norman JM, Moreno A, Zhang J, Ahnert SE, Benfey PN. Oscillating gene  
409 expression determines competence for periodic *Arabidopsis* root branching. *Science* **329**, 1306-  
410 1311 (2010).

411

412 6. De Smet I, *et al.* Auxin-dependent regulation of lateral root positioning in the basal meristem of

- 413 Arabidopsis. *Development* **134**, 681-690 (2007).  
414
- 415 7. Xuan W, *et al.* Cyclic programmed cell death stimulates hormone signaling and root development  
416 in Arabidopsis. *Science* **351**, 384-387 (2016).  
417
- 418 8. Adamowski M, Friml J. PIN-dependent auxin transport: action, regulation, and evolution. *Plant Cell*  
419 **27**, 20-32 (2015).  
420
- 421 9. Rosquete MR, Barbez E, Kleine-Vehn J. Cellular auxin homeostasis: gatekeeping is housekeeping.  
422 *Mol Plant* **5**, 772-786 (2012).  
423
- 424 10. De Rybel B, *et al.* A novel aux/IAA28 signaling cascade activates GATA23-dependent specification  
425 of lateral root founder cell identity. *Curr Biol* **20**, 1697-1706 (2010).  
426
- 427 11. De Rybel B, *et al.* A role for the root cap in root branching revealed by the non-auxin probe naxillin.  
428 *Nat Chem Biol* **8**, 798-805 (2012).  
429
- 430 12. Xuan W, *et al.* Root Cap-Derived Auxin Pre-patterns the Longitudinal Axis of the Arabidopsis Root.  
431 *Curr Biol* **25**, 1381-1388 (2015).  
432
- 433 13. Grieneisen VA, Xu J, Märee AF, Hogeweg P, Scheres B. Auxin transport is sufficient to generate a  
434 maximum and gradient guiding root growth. *Nature* **449**, 1008-1013 (2007).  
435
- 436 14. Swarup R, Bhosale R. Developmental Roles of AUX1/LAX Auxin Influx Carriers in Plants. *Front Plant*  
437 *Sci* **10**, 1306 (2019).  
438
- 439 15. Wisniewska J, *et al.* Polar PIN localization directs auxin flow in plants. *Science* **312**, 883 (2006).  
440
- 441 16. Bailly A, *et al.* Modulation of P-glycoproteins by auxin transport inhibitors is mediated by  
442 interaction with immunophilins. *J Biol Chem* **283**, 21817-21826 (2008).  
443
- 444 17. Casimiro I, *et al.* Auxin transport promotes Arabidopsis lateral root initiation. *Plant Cell* **13**, 843-  
445 852 (2001).  
446
- 447 18. Kim JY, *et al.* Identification of an ABCB/P-glycoprotein-specific inhibitor of auxin transport by  
448 chemical genomics. *J Biol Chem* **285**, 23309-23317 (2010).  
449
- 450 19. Henrichs S, *et al.* Regulation of ABCB1/PGP1-catalysed auxin transport by linker phosphorylation.  
451 *EMBO J* **31**, 2965-2980 (2012).  
452
- 453 20. Teale W, Palme K. Naphthylphthalamic acid and the mechanism of polar auxin transport. *J Exp Bot*  
454 **69**, 303-312 (2018).  
455
- 456 21. Hao P, *et al.* A conserved D/E-P motif in the nucleotide binding domain of plant ABCB/PGP-type



- 457 ABC transporters defines their auxin transport capacity. (2020).  
458
- 459 22. Carbonell A, Takeda A, Fahlgren N, Johnson SC, Cuperus JT, Carrington JC. New generation of  
460 artificial MicroRNA and synthetic trans-acting small interfering RNA vectors for efficient gene  
461 silencing in Arabidopsis. *Plant Physiol* **165**, 15-29 (2014).  
462
- 463 23. Marques-Bueno MDM, *et al.* A versatile Multisite Gateway-compatible promoter and transgenic  
464 line collection for cell type-specific functional genomics in Arabidopsis. *Plant J* **85**, 320-333 (2016).  
465
- 466 24. Noh B, Murphy AS, Spalding EP. Multidrug resistance-like genes of Arabidopsis required for auxin  
467 transport and auxin-mediated development. *Plant Cell* **13**, 2441-2454 (2001).  
468
- 469 25. Wu G, Otegui MS, Spalding EP. The ER-localized TWD1 immunophilin is necessary for localization  
470 of multidrug resistance-like proteins required for polar auxin transport in Arabidopsis roots. *Plant*  
471 *Cell* **22**, 3295-3304 (2010).  
472
- 473 26. Zhang Y, *et al.* A transportome-scale amiRNA-based screen identifies redundant roles of  
474 Arabidopsis ABCB6 and ABCB20 in auxin transport. *Nat Commun* **9**, 4204 (2018).  
475
- 476 27. Geisler M, *et al.* TWISTED DWARF1, a unique plasma membrane-anchored immunophilin-like  
477 protein, interacts with Arabidopsis multidrug resistance-like transporters AtPGP1 and AtPGP19.  
478 *Mol Biol Cell* **14**, 4238-4249 (2003).  
479
- 480 28. Blakeslee JJ, *et al.* Interactions among PIN-FORMED and P-glycoprotein auxin transporters in  
481 Arabidopsis. *Plant Cell* **19**, 131-147 (2007).  
482
- 483 29. Brumos J, Bobay BG, Clark CA, Alonso JM, Stepanova AN. Structure-function analysis of interallelic  
484 complementation in ROOTY transheterozygotes. *Plant Physiol*, (2020).  
485
- 486 30. Geisler M, Aryal B, di Donato M, Hao P. A Critical View on ABC Transporters and Their Interacting  
487 Partners in Auxin Transport. *Plant Cell Physiol* **58**, 1601-1614 (2017).  
488
- 489 31. Kaneda M, *et al.* ABC transporters coordinately expressed during lignification of Arabidopsis stems  
490 include a set of ABCBs associated with auxin transport. *J Exp Bot* **62**, 2063-2077 (2011).  
491
- 492 32. Geisler M, *et al.* Cellular efflux of auxin catalyzed by the Arabidopsis MDR/PGP transporter AtPGP1.  
493 *Plant J* **44**, 179-194 (2005).  
494
- 495 33. Mashiguchi K, *et al.* The main auxin biosynthesis pathway in Arabidopsis. *Proc Natl Acad Sci U S A*  
496 **108**, 18512-18517 (2011).  
497
- 498 34. Won C, *et al.* Conversion of tryptophan to indole-3-acetic acid by TRYPTOPHAN  
499 AMINOTRANSFERASES OF ARABIDOPSIS and YUCCAs in Arabidopsis. *Proc Natl Acad Sci U S A*  
500 **108**, 18518-18523 (2011).

- 501  
502 35. Mellor NL, Voss U, Janes G, Bennett MJ, Wells DM, Band LR. Auxin fluxes through plasmodesmata  
503 modify root-tip auxin distribution. *Development* **147**, (2020).  
504  
505 36. Heisler MG, *et al.* Patterns of auxin transport and gene expression during primordium development  
506 revealed by live imaging of the Arabidopsis inflorescence meristem. *Curr Biol* **15**, 1899-1911 (2005).  
507  
508 37. Karimi M, Bleys A, Vanderhaeghen R, Hilson P. Building blocks for plant gene assembly. *Plant*  
509 *Physiol* **145**, 1183-1191 (2007).  
510  
511 38. Zuo J, Niu QW, Chua NH. Technical advance: An estrogen receptor-based transactivator XVE  
512 mediates highly inducible gene expression in transgenic plants. *Plant J* **24**, 265-273 (2000).  
513  
514 39. Kim JH, *et al.* High cleavage efficiency of a 2A peptide derived from porcine teschovirus-1 in human  
515 cell lines, zebrafish and mice. *PLoS One* **6**, e18556 (2011).  
516  
517 40. Chen H, Nelson RS, Sherwood JL. Enhanced recovery of transformants of *Agrobacterium*  
518 *tumefaciens* after freeze-thaw transformation and drug selection. *Biotechniques* **16**, 664-668, 670  
519 (1994).  
520  
521 41. Clough SJ, Bent AF. Floral dip: a simplified method for *Agrobacterium*-mediated transformation of  
522 *Arabidopsis thaliana*. *Plant J* **16**, 735-743 (1998).  
523  
524 42. Schindelin J, Rueden CT, Hiner MC, Eliceiri KW. The ImageJ ecosystem: An open platform for  
525 biomedical image analysis. *Mol Reprod Dev* **82**, 518-529 (2015).  
526  
527 43. Malamy JE, Benfey PN. Organization and cell differentiation in lateral roots of *Arabidopsis thaliana*.  
528 *Development* **124**, 33-44 (1997).  
529  
530 44. Xuan W, Opendacker D, Vanneste S, Beeckman T. Long-Term In Vivo Imaging of Luciferase-Based  
531 Reporter Gene Expression in *Arabidopsis* Roots. *Methods Mol Biol* **1761**, 177-190 (2018).  
532  
533 45. Beeckman T, Viane R. Embedding thin plant specimens for oriented sectioning. *Biotech Histochem*  
534 **75**, 23-26 (2000).  
535  
536 46. De Smet I, Chaerle P, Vanneste S, De Rycke R, Inze D, Beeckman T. An easy and versatile embedding  
537 method for transverse sections. *J Microsc* **213**, 76-80 (2004).  
538  
539 47. Saitou N, Nei M. The neighbor-joining method: a new method for reconstructing phylogenetic  
540 trees. *Mol Biol Evol* **4**, 406-425 (1987).  
541  
542 48. Felsenstein J. Confidence Limits on Phylogenies: An Approach Using the Bootstrap. *Evolution* **39**,  
543 783-791 (1985).  
544

- 545 49. Kumar S, Stecher G, Tamura K. MEGA7: Molecular Evolutionary Genetics Analysis Version 7.0 for  
546 Bigger Datasets. *Mol Biol Evol* **33**, 1870-1874 (2016).  
547
- 548 50. Lei Y, Lu L, Liu HY, Li S, Xing F, Chen LL. CRISPR-P: a web tool for synthetic single-guide RNA design  
549 of CRISPR-system in plants. *Mol Plant* **7**, 1494-1496 (2014).  
550
- 551 51. Engler C, *et al.* A golden gate modular cloning toolbox for plants. *ACS Synth Biol* **3**, 839-843 (2014).  
552
- 553 52. Soyk S, *et al.* Bypassing Negative Epistasis on Yield in Tomato Imposed by a Domestication Gene.  
554 *Cell* **169**, 1142-1155 e1112 (2017).  
555
- 556 53. Decaestecker W, *et al.* CRISPR-TSKO: A Technique for Efficient Mutagenesis in Specific Cell Types,  
557 Tissues, or Organs in Arabidopsis. *Plant Cell* **31**, 2868-2887 (2019).  
558
- 559 54. Quinlan AR. BEDTools: The Swiss-Army Tool for Genome Feature Analysis. *Curr Protoc*  
560 *Bioinformatics* **47**, 11 12 11-34 (2014).  
561  
562  
563  
564  
565  
566  
567  
568  
569

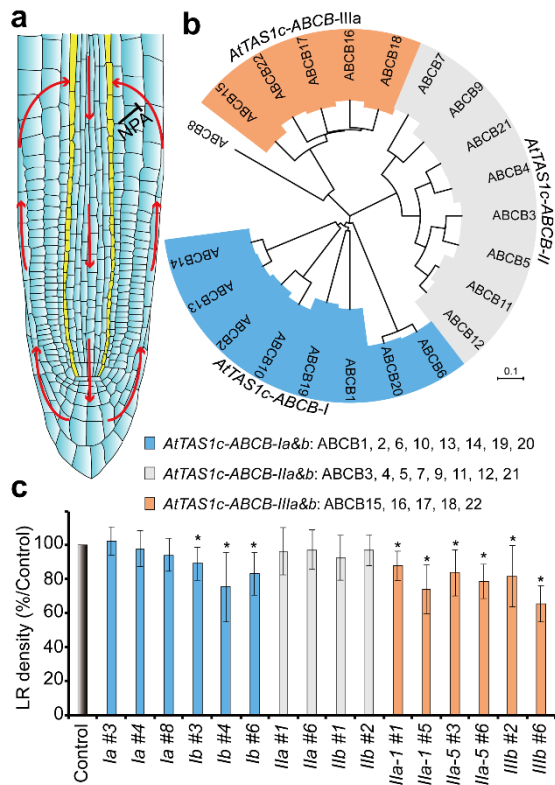

577

578 **Fig. 1: Phenotypic screen of the *ABCB* gene family for regulators of LR formation using *PIN2***  
 579 **driven syn-tasi-RNA-based gene-silencing.** **a** Reverse fountain model of auxin transport in the  
 580 *Arabidopsis* root apical meristem. Red arrows show the major auxin transport directions. The pericycle  
 581 is indicated in yellow. **b** Phylogenetic tree of *ABCB* gene family. Subgroup genes targeted by different  
 582 synthetic *AtTAS1c* constructs are colored blue (*AtTAS1c-ABCB-I*), grey (*AtTAS1c-ABCB-II*) and orange  
 583 (*AtTAS1c-ABCB-III*). Syn-tasi-RNA constructs are driven by the *PIN2* promoter. **c** Quantification of the  
 584 emerged lateral root density of 10-day-old *AtTAS1c* lines relative to WTs grown on the same plate in the  
 585 initial phenotypic screen, shown are averages ( $\pm$ SD) of > 15 plants. WT controls are set to 100%, \*  
 586 indicates  $P < 0.05$  by two-tailed Student's t-test relative to WT. Colors correspond to different  
 587 subgroups as indicated in **b**.  
 588

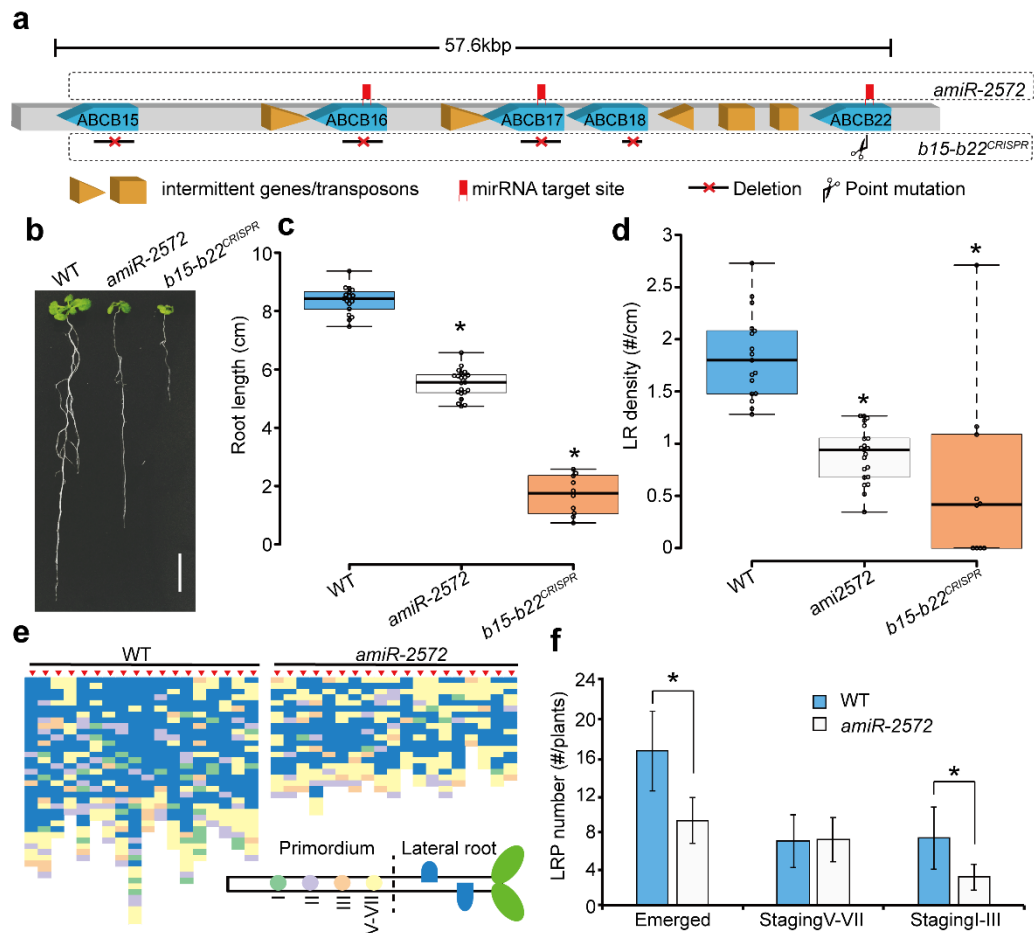

589

590 **Fig. 2: amiRNA and CRISPR confirm the importance of subgroup III ABCBs in LR development.**

591 **a** Organization of subgroup III ABCBs on the chromosome. All *ABCB* coding-regions are highlighted in blue, intermittent genes and transposons are highlighted in orange. *amiR-2572* target sites in the  
592 respective *ABCB*s are indicated with red marker in the square upper. The deletion within *ABCB15*, 16,  
593 17, 18 and the point mutation site of *ABCB22* in *b15-b22<sup>CRISPR</sup>* are indicated in the square below. **b**  
594 Macroscopic seedling phenotype of 15-day-old *amiR-2572* and *b15-b22<sup>CRISPR</sup>* compared to WT. Scale  
595 bar is 1 cm. **c**, **d** Boxplots showing the quantification of emerged lateral root number (**c**) and root length  
596 (**d**) in 15-day-old WT, *amiR-2572* lines and *b15-b22<sup>CRISPR</sup>* mutant seedlings. Center lines show the  
597 medians; box limits indicate the 25th and 75th percentiles as determined by R software; whiskers extend  
598 1.5 times the interquartile range from the 25th and 75th percentiles, outliers are represented by dots;  
599 data points are plotted as open circles. n = 17 (WT), 21 (*amiR-2572*), 10 (*b15-b22<sup>CRISPR</sup>*), \* indicates P  
600 < 0.05 (two-tailed Student's t-test). **e** Schematic representation of the distribution of emerged LRs and  
601 LRP along the primary root in 8-day-old WT and *amiR-2572* seedlings, (n=18 for WT and 19 for *amiR-*  
602 *2572*). The color code corresponds to different LRP stages as indicated on the schematic root below. **f**  
603 Quantification of different LRP stages and emerged LR per root in (a), shown are averages ( $\pm$ SD), \*  
604 indicates P < 0.05 (two-tailed Student's t-test).  
605

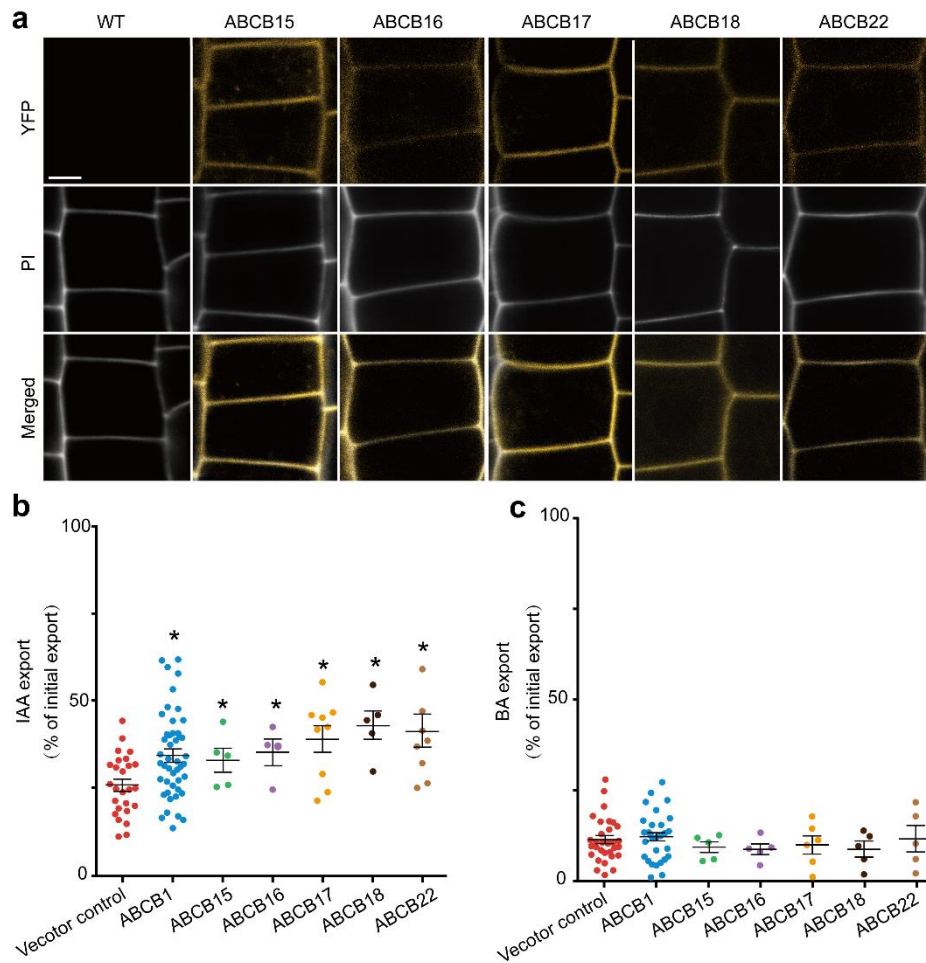

606

607 **Fig. 3: Subgroup III ABCBs localize to the plasma membrane and promote auxin transport.** **a**  
608 Epidermal YFP fluorescence in primary root meristems of 3-day-old WT, *pro35S:YFP-ABCB15*,  
609 *pro35S:YFP-ABCB16*, *pro35S:YFP-ABCB17*, *pro35S:YFP-ABCB18*, *pro35S:YFP-ABCB22*. Cell walls  
610 are stained by Propidium iodide (PI) in grey. Scale bars represent 10  $\mu$ m. All pictures were analyzed  
611 using the same magnification. **b, c** IAA and BA export assay. Export of radiolabeled IAA (**b**) and benzoic  
612 acid BA (**c**) assayed in parallel from tobacco mesophyll protoplasts expressing indicated *ABCBs* of  
613 subgroup III against vector control. \* indicates  $P < 0.05$  (unpaired t-test with Welch's correction) (mean  
614  $\pm$  SE;  $n \geq 4$  transport experiments generated from independent tobacco transfections).

615



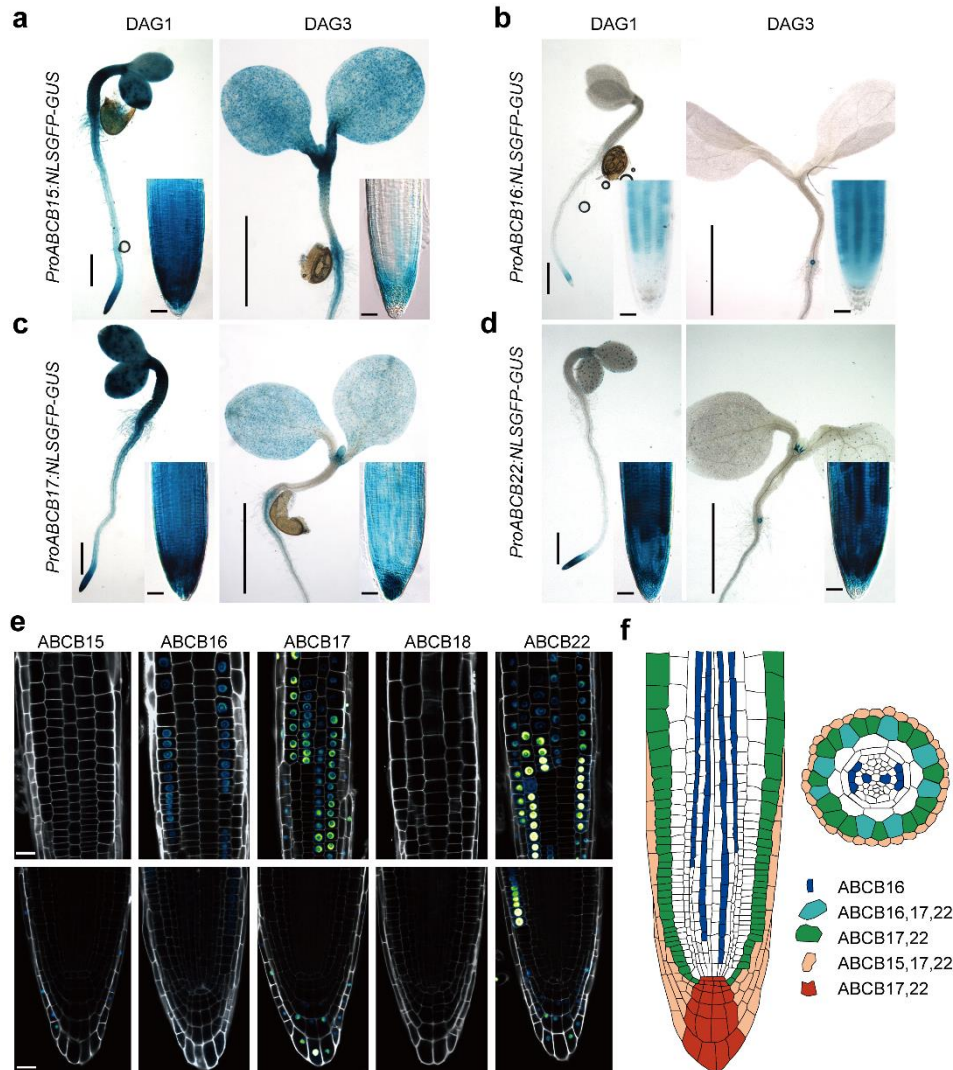

616

617

618 **Fig. 4: Overview of the expression patterns of subgroup III ABCBs. a,b,c, d** GUS expression pattern

619 of *proABCB*<sub>(15,16,17,18,22)</sub>:NLSGFP-GUS in 1- and 3-day-after germination seedlings (DAG). Scale bars =

620 0.5mm, for inset = 20 μm. **e** Surface and median view of GFP fluorescence in *proABCB15:NLSGFP-*

621 *GUS*, *proABCB16:NLSGFP-GUS*, *proABCB17:NLSGFP-GUS*, *proABCB18:NLSGFP-GUS*, and

622 *proABCB22:NLSGFP-GUS* expression in roots of 3-day-old seedlings. Propidium iodide in grey. Scale

623 bars represent 20 μm. **f** Summary of ABCB subgroup III expression domains in the root apical meristem

624 indicated on a longitudinal and radial section.

625



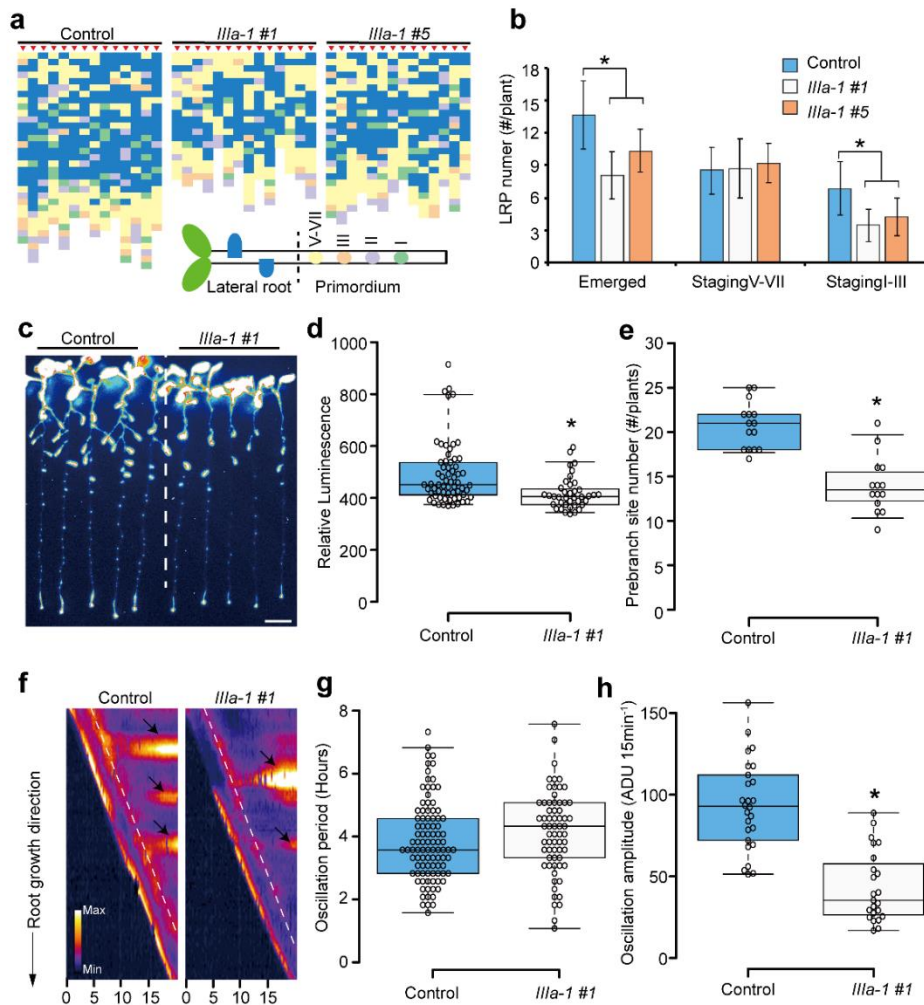

652  
 653 **Figure 5: Subgroup III ABCBs control lateral root spacing by regulating pre-branch site number**  
 654 **and the auxin oscillation amplitude.** **a** Schematic representation of the distribution of emerged LR  
 655 and LRP along the primary root in 8-day-old WT and *AtTAS1c-Illia* (Line1 and line5) seedlings (n = 10).  
 656 The color code corresponds to different LRP stages as indicated in the schematic root. Each column  
 657 represents an individual root indicated by red arrowheads. **b** Quantification of different LR stages and  
 658 emerged LRs in **(a)**, shown are averages ( $\pm$ SD) (n = 10). **c** Pre-branch sites in 8-day-old WT and  
 659 *AtTAS1c-Illia* line1 as determined by *DR5:LUC* luminescence. Scale bar represent 0.8 cm. **d**  
 660 Quantification of *DR5:LUC* luminescence intensity of the pre-branch sites in 8-day-old WT (n = 64) and  
 661 *AtTAS1c-Illia* line1 (*Illia-1* #1; n = 39) seedlings. **e** Quantification of pre-branch site number per root in  
 662 **(c)**. n = 15 (WT), 14 (*Illia-1* line 1). **f** Kymograph of *DR5:LUC* intensity along the primary root in 3-day-  
 663 old WT and *AtTAS1c-Illia* line1 seedlings over 20 hr. *DR5:LUC* luminescence intensity is color coded  
 664 (see color code in the bottom left corner of the panels) and plotted following the primary root elongation  
 665 (y-axis) and time (x-axis). The arrows highlight pre-branch sites and white dashed lines indicate the  
 666 *DR5:LUC* signal in OZ. **g, h** Quantification of the oscillation period (**g**) and amplitude (**h**) of *DR5:LUC* in  
 667 3-day-old WT and *AtTAS1c-Illia* (line1) (n = 24). Center lines in box plots show the medians; box limits  
 668 indicate the 25th and 75th percentiles as determined by R software; whiskers extend to 5th and 95th  
 669 percentiles, outliers are represented by dots; data points are plotted as open circles. \* indicates P < 0.05  
 670 (two-tailed Student's t-test)

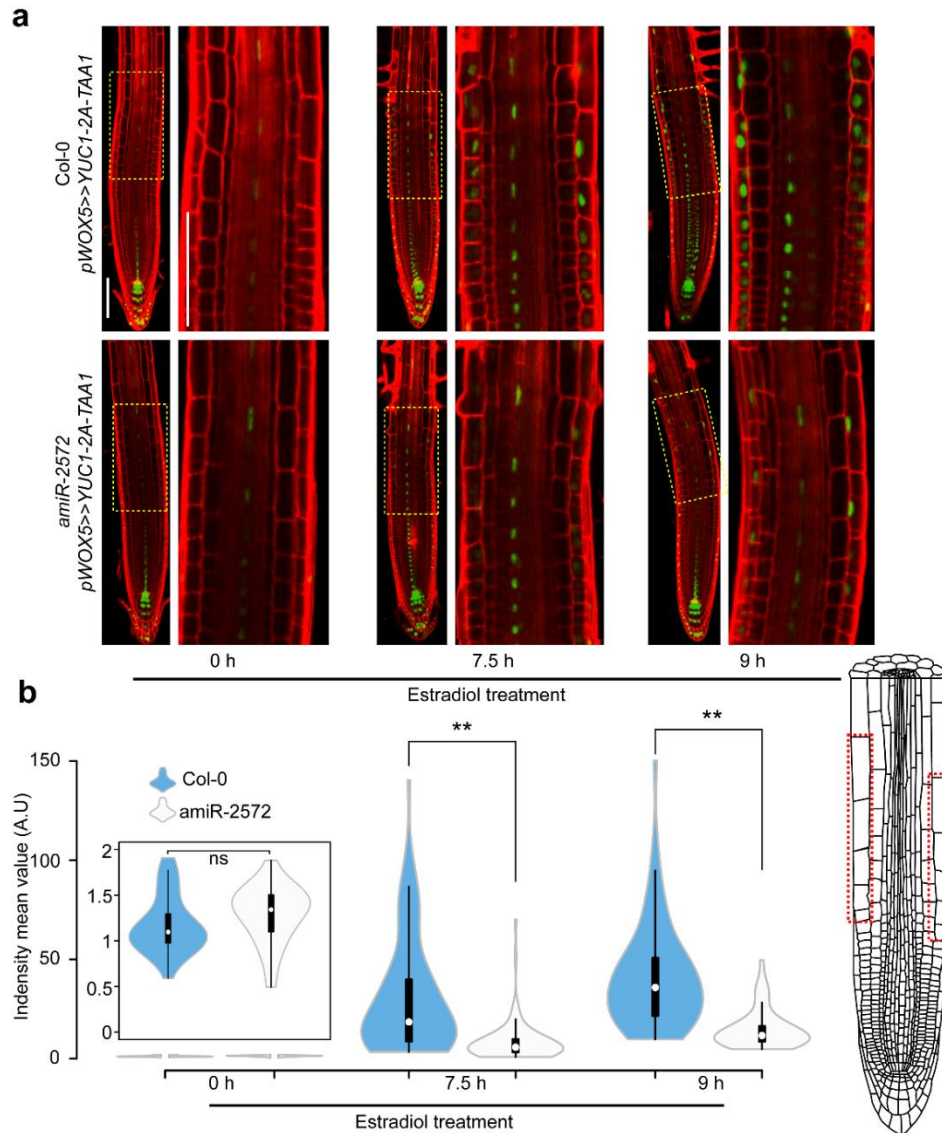

671

672 **Figure 6 Subgroup III ABCBs contribute to shootward auxin transport in the LRC and meristem.**

673 **a** Analysis of *DR5:VENUS* expression in the root elongation zone of 4-day-old *pWOX5>>YUC1-2A-*

674 *TAA1*, in Col-0 and *amiR-2572* treated with  $\beta$ -estradiol (5  $\mu$ M) for 0, 7.5 and 9h. Propidium iodide in red.

675 Yellow squares indicate zoomed pictures. Scale bar = 100  $\mu$ M. **b** Quantification of *DR5:VENUS* signals

676 in the epidermis of the elongation zone, as indicated in the scheme (Red square). White dots indicate

677 the medians; box limits indicate the 25th and 75th percentiles as determined by R software; whiskers

678 extend 1.5 times the interquartile range from the 25th and 75th percentiles; polygons represent density

679 estimates of data and extend to extreme values. 10 cells in the elongation zone per seedling and at least

680 4 seedlings of each treatment were measured \*\* indicates  $P < 0.01$  (two-tailed Student's t-test).

681
